# Supplementary material
Source: PubMed Central journal article supplement (PMC10150797)
Supplement: NIHMS1866081-supplement-2.pdf [file NIHMS1866081-supplement-2.pdf]

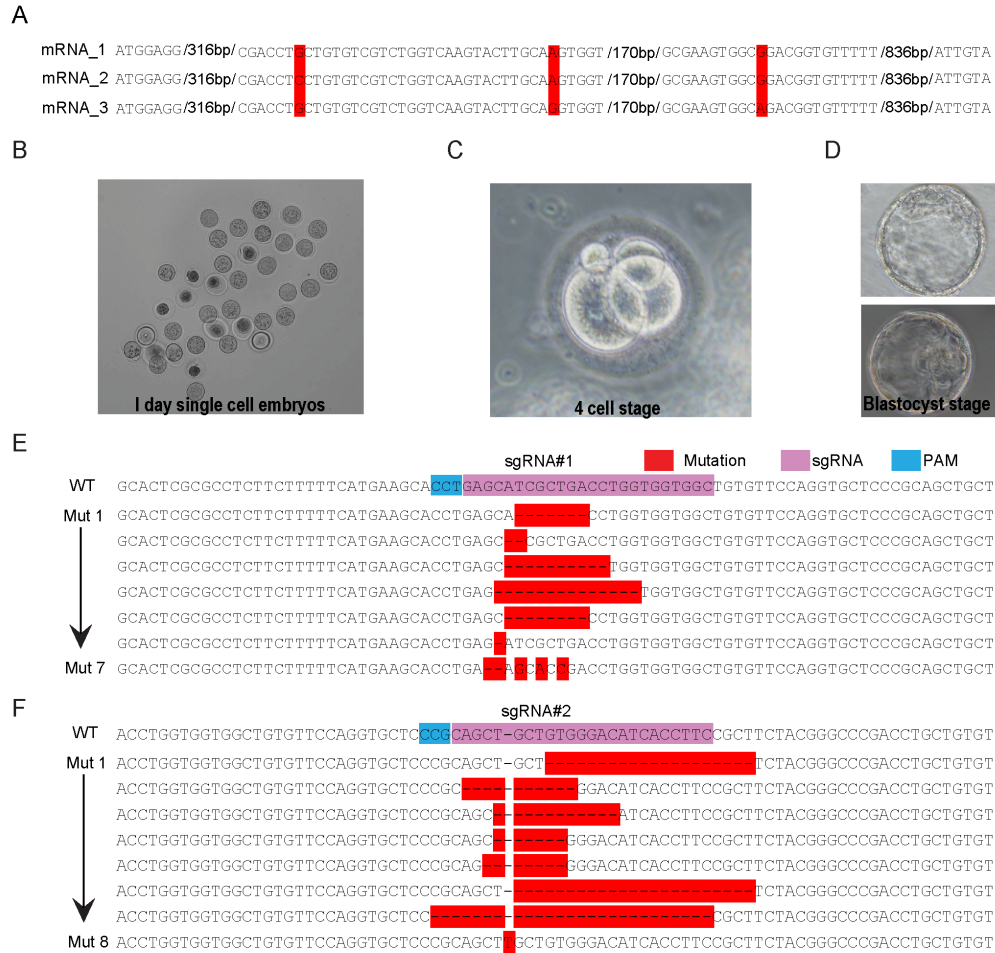

**Figure S1. CRISPR mutagenesis and culture of vole embryos; related to Figure 1**

**A.** 3 naturally occurring synonymous substitutions in *Oxtr* exon1 from 4 WT voles.

**B.** Embryos harvested from female voles prior to pronuclear injection.

**C.** Embryo at the 4 cell stage 1 day after ribonucleoprotein complex injection.

**D.** Blastocysts grown in vitro, 4 days after injection.

**E.** Sequences from individual blastocysts after injection with sgRNA#1.

**F.** Sequences from individual blastocysts after injection with sgRNA#2.

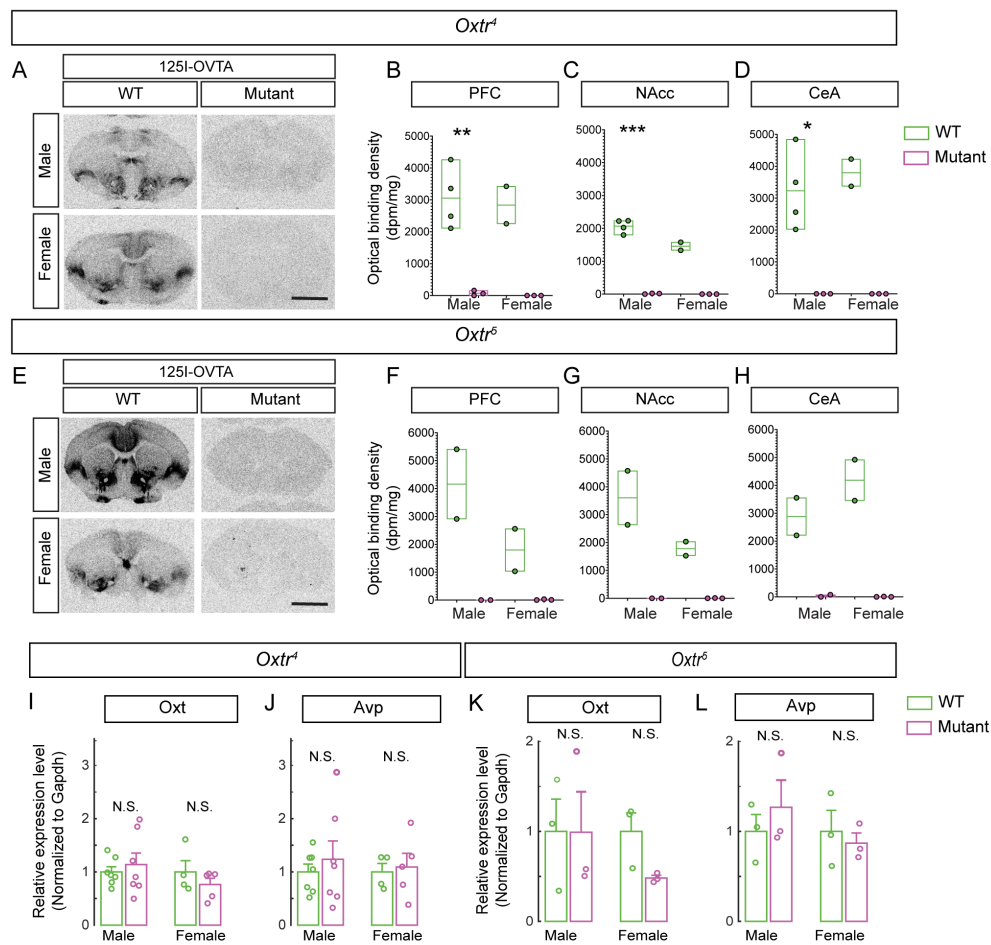

**Figure S2. *Oxt*<sup>4</sup> and *Oxt*<sup>5</sup> translation products do not bind ligand and do not result in changes in transcription of *Oxt* or *Avp*; related to Figure 2**

**A,E.** Loss of binding with the competitive agonist 125I-OVTA visualized in coronal sections through the rostral telencephalon of *Oxt*<sup>4/-</sup> (A) and *Oxt*<sup>5/-</sup> (E) voles.

**B-D, F-H.** Optical density based quantification of binding to 125I-OVTA shows that binding in *Oxt*<sup>4/-</sup> and *Oxt*<sup>5/-</sup> voles is essentially undetectable in PFC (B, F), NAcc (C, G), and CeA (D, H).

Scale bar = 5 mm, boxplot depicts max-min, midline denotes mean; n = 4 WT and 3 mutant males, 2 WT and 3 mutant females (B, C, D), 2 WT and mutant males each, 2 WT and 3 mutant females (F, G, H); \*p<0.05, \*\*p<0.01, \*\*\*p<0.001.

**I, J.** No compensatory increase in Oxt (I) or Avp (J) mRNA levels in paraventricular nucleus (PVN) of *Oxtr*<sup>4-/-</sup> voles.

**K, L.** No compensatory increase in Oxt (K) or Avp (L) mRNA levels in PVN of *Oxtr*<sup>5-/-</sup> voles.

Mean ± SEM; n = 7 WT and mutant males each, 4 WT and 5 mutant females (I), 7 WT and 6 mutant males, 4 WT and 5 mutant females (J), 8 WT and mutant males each (2-3 animals were pooled for each point) (K), 9 WT and mutant females each (3 animals were pooled for each point) (L); N.S., not significant.

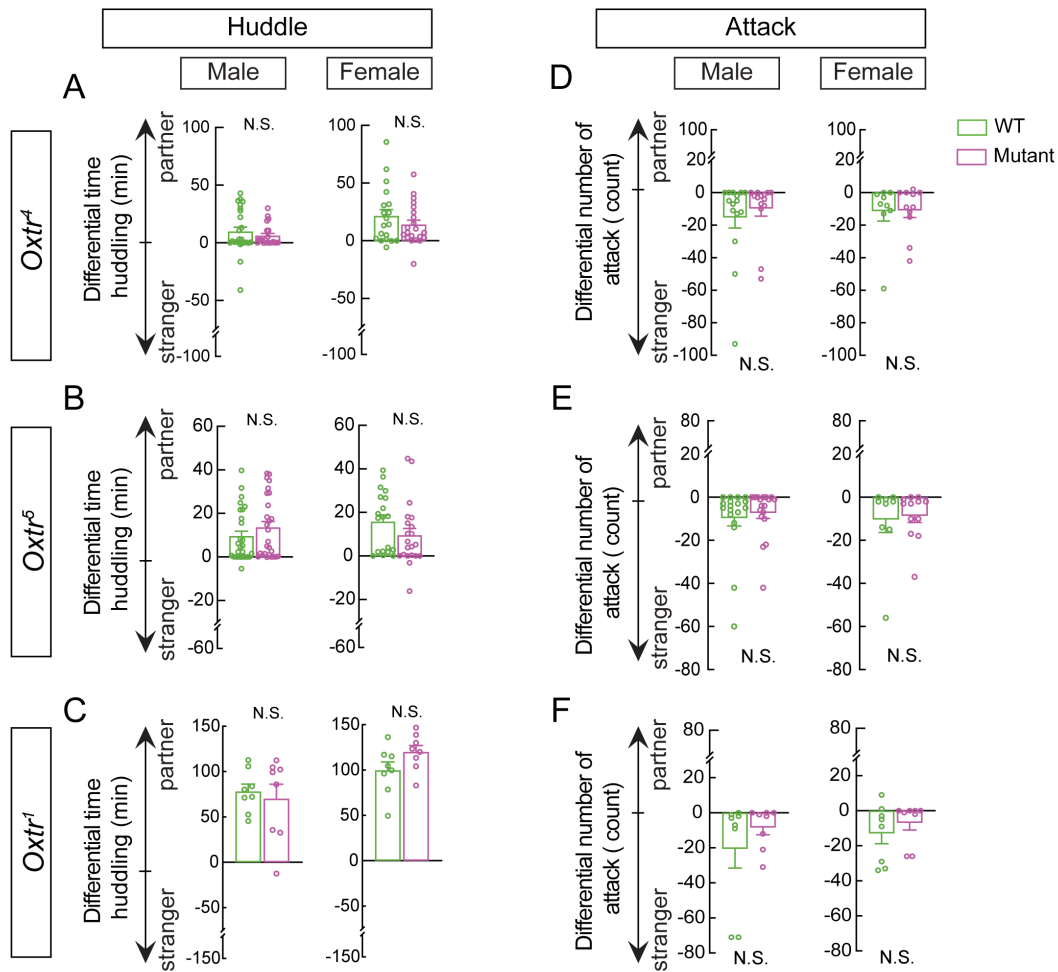

**Figure S3. *Oxtr* null voles form pair bonds; related to Figure 3**

**A-C.** No difference in time spent huddling differentially with partner over stranger of opposite sex between WT and *Oxtr<sup>4</sup>* (A), *Oxtr<sup>5</sup>* (B), or *Oxtr<sup>1</sup>* (C) voles. For individual experimental voles, differential time huddling = duration huddling with partner – duration huddling with stranger.

**D-F.** No difference in number spent differentially attacking stranger of opposite sex between WT, *Oxtr<sup>4</sup>* (D), *Oxtr<sup>5</sup>* (E) and *Oxtr<sup>1</sup>* (F) voles. For individual experimental voles, differential number attacking = number attacking partner – number attacking stranger.

Mean  $\pm$  SEM; n = 25 WT and 21 mutant males, 19 WT and 21 mutant females (A), 27 WT and mutant males each, 19 WT and 21 mutant females (B), 8 WT mutant males and females each (C), 15 WT and 14 mutant males, 9 WT and 11 mutant females (D), 18 WT and mutant males each, 9 WT and 12 mutant females (E); 8 WT and mutant males and females each (F); \* $p < 0.05$ , \*\* $p < 0.01$ , \*\*\* $p < 0.001$ ; N.S., not significant.

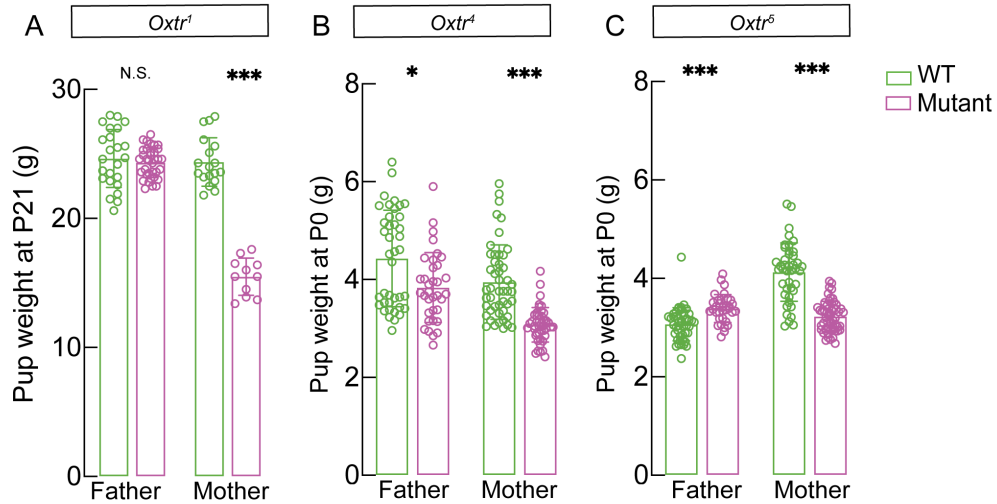

**Figure S4. Prairie voles lacking *Oxtr* have altered weight on day of birth and weaning; related to Figure 4**

**A.** *Oxtr<sup>1-/-</sup>* fathers weaned pups with no difference in body weight while *Oxtr<sup>1-/-</sup>* mothers weaned pups with significantly lower body weight compared to WT parents.

**B.** *Oxtr<sup>4-/-</sup>* fathers and mothers had pups with lower body weights at birth compared to WT parents

**C.** *Oxtr<sup>5-/-</sup>* mothers had pups with lower body weights at birth compared to WT parents, while fathers had pups with increased weight at birth.

Mean  $\pm$  SEM; n = 24 WT and 35 mutant males, 18 WT and 11 mutant females (A); 40 WT and 35 mutant males, 48 WT and 45 mutant females (B); 45 WT and 34 mutant males each, 42 WT and 53 mutant females (C); \* $p < 0.05$ , \*\* $p < 0.01$ , \*\*\* $p < 0.001$ ; N.S., not significant.
